# Supplementary material for: Age and Cytokine Gene Variants Modulate the Immunogenicity and Protective Effect of SARS-CoV-2 mRNA-Based Vaccination
Source: MDPI journal article supplement (doi:10.3390/vaccines11020413), 2023-02-10
Supplement: s1 [file s1]

**Table S1.** Influence of the different cytokine gene polymorphisms on the SARS-CoV-2 S1/S2 antibody titer 31 days after administration of the second dose of recombinant anti-SARS-CoV-2 mRNA vaccine

| Genes and alleles |           | Day 31         |       |                |       |                  |                   | p*     |
|-------------------|-----------|----------------|-------|----------------|-------|------------------|-------------------|--------|
|                   |           | Titer < median |       | Titer ≥ median |       | OR (95% CI)      |                   |        |
|                   |           | N              | Freq. | N              | Freq. |                  |                   |        |
| IL-1A             | rs1800587 | C              | 77    | 0.64           | 79    | 0.64             | 1.02 (61-1.72)    | 1.00   |
|                   |           | T              | 43    | 0.36           | 45    | 0.36             |                   |        |
|                   |           | C/C            | 22    | 0.37           | 21    | 0.34             | 1.13 (0.54-2.38)  | 0.85   |
|                   |           | C/T            | 33    | 0.55           | 37    | 0.60             | 1.07 (0.51-2.26)  | 0.85   |
|                   |           | T/T            | 5     | 0.08           | 4     | 0.06             | 0.94 (0.23-3.88)  | 0.93   |
| IL-1B             | rs1143634 | C              | 75    | 0.62           | 88    | 0.71             | 0.69 (0.40-1.16)  | 0.18   |
|                   |           | T              | 45    | 0.38           | 36    | 0.29             |                   |        |
|                   |           | C/C            | 23    | 0.38           | 29    | 0.47             | 0.37 (0.35-1.45)  | 0.71   |
|                   |           | C/T            | 29    | 0.48           | 30    | 0.48             | 0.97 (0.47-2.02)  | 0.94   |
|                   |           | T/T            | 8     | 0.13           | 3     | 0.05             | 0.32 (0.08-1.29)  | 0.091  |
|                   | rs16944   | G              | 76    | 0.63           | 85    | 0.69             | 0.79 (0.47-1.35)  | 0.42   |
|                   |           | A              | 44    | 0.37           | 39    | 0.31             |                   |        |
|                   |           | G/G            | 22    | 0.37           | 27    | 0.44             | 0.75 (0.36-1.55)  | 0.46   |
|                   |           | A/G            | 32    | 0.53           | 31    | 0.5              | 0.91 (0.43-1.93)  | 0.81   |
|                   | A/A       | 6              | 0.1   | 4              | 0.06  | 0.70 (0.18-2.68) | 0.6               |        |
| IL-1RN            | rs315952  | T              | 84    | 0.7            | 84    | 0.68             | 1.11 (0.65-1.91)  | 0.78   |
|                   |           | C              | 36    | 0.3            | 40    | 0.32             |                   |        |
|                   |           | T/T            | 29    | 0.48           | 24    | 0.39             | 1.48 (0.72-3.04)  | 0.36   |
|                   |           | C/T            | 26    | 0.43           | 36    | 0.58             | 0.46 (0.08-2.60)  | 0.36   |
|                   |           | C/C            | 5     | 0.08           | 2     | 0.03             | 1.68 (0.80-3.52)  | 0.17   |
| IL-1R1            | rs2234650 | C              | 73    | 0.61           | 61    | 0.49             | 1.60 (0.97-2.67)  | 0.07   |
|                   |           | T              | 47    | 0.39           | 63    | 0.51             |                   |        |
|                   |           | C/C            | 16    | 0.27           | 5     | 0.08             | 0.24 (0.08-0.71)  | 0.0081 |
|                   |           | C/T            | 41    | 0.68           | 51    | 0.82             | 2.00 (0.84-4.77)  | 0.11   |
|                   |           | T/T            | 3     | 0.05           | 6     | 0.1              | 2.47 (0.56-10.88) | 0.22   |
| IL6               | rs1800795 | G              | 75    | 0.62           | 99    | 0.8              | 0.42 (0.24-0.75)  | 0.003  |
|                   |           | C              | 45    | 0.38           | 25    | 0.2              |                   |        |
|                   |           | G/G            | 27    | 0.45           | 43    | 0.69             | 2.77 (1.31-5.81)  | 0.011  |
|                   |           | C/G            | 21    | 0.35           | 13    | 0.21             | 0.49 (0.21-1.12)  | 0.086  |
|                   |           | C/C            | 12    | 0.2            | 6     | 0.1              | 0.53 (0.18-1.57)  | 0.24   |
| TNFA              | rs1800629 | G              | 94    | 0.78           | 108   | 0.87             | 0.54 (0.27-1.06)  | 0.09   |
|                   |           | A              | 26    | 0.22           | 16    | 0.13             |                   |        |
|                   |           | G/G            | 37    | 0.62           | 48    | 0.77             | 0.47 (0.21-1.04)  | 0.076  |
|                   |           | G/A            | 20    | 0.33           | 12    | 0.19             | 0.51 (0.22-1.21)  | 0.12   |
|                   |           | A/A            | 3     | 0.05           | 2     | 0.03             | 0.72 (0.11-4.71)  | 0.73   |
| IL-18             | rs 187238 | G              | 84    | 0.7            | 94    | 0.76             | 0.75 (0.42-1.31)  | 0.32   |
|                   |           | C              | 36    | 0.3            | 30    | 0.24             |                   |        |
|                   |           | G/G            | 29    | 0.48           | 33    | 0.53             | 0.82 (0.41-1.67)  | 0.72   |
|                   |           | C/G            | 26    | 0.43           | 28    | 0.45             | 1.25 (0.59-2.64)  | 0.56   |
|                   |           | C/C            | 5     | 0.08           | 1     | 0.02             | 0.20 (0.02-1.86)  | 0.11   |
|                   | rs1946518 | G              | 63    | 0.52           | 69    | 0.56             | 0.82 (0.40-1.67)  | 0.72   |
|                   |           | T              | 57    | 0.48           | 55    | 0.44             |                   |        |
|                   |           | G/G            | 11    | 0.18           | 14    | 0.23             | 0.77 (0.32-1.86)  | 0.66   |
|                   |           | G/T            | 41    | 0.68           | 41    | 0.66             | 0.82 (0.37-1.79)  | 0.62   |
|                   | T/T       | 8              | 0.13  | 7              | 0.11  | 0.87 (0.29-2.67) | 0.81              |        |
| IL-10             | rs1800896 | A              | 67    | 0.56           | 55    | 0.44             | 1.59 (0.96-2.63)  | 0.096  |
|                   |           | G              | 53    | 0.44           | 69    | 0.56             |                   |        |
|                   |           | A/A            | 18    | 0.3            | 12    | 0.19             | 1.79 (0.77-4.13)  | 0.212  |
|                   |           | A/G            | 31    | 0.52           | 31    | 0.5              | 0.96 (0.46-1.98)  | 0.902  |
|                   |           | G/G            | 11    | 0.18           | 19    | 0.31             | 1.66 (0.69-3.97)  | 0.254  |

|       |           |     |    |      |    |      |                  |       |
|-------|-----------|-----|----|------|----|------|------------------|-------|
|       | rs1800872 | C   | 94 | 0.78 | 96 | 0.77 | 1.05 (0.58-1.93) | 0.882 |
|       |           | A   | 26 | 0.22 | 28 | 0.23 |                  |       |
|       |           | C/C | 36 | 0.6  | 37 | 0.6  |                  |       |
|       |           | A/C | 22 | 0.37 | 22 | 0.35 |                  |       |
|       |           | A/A | 2  | 0.03 | 3  | 0.05 |                  |       |
|       | rs3021097 | C   | 85 | 0.71 | 87 | 0.7  | 1.03 (0.59-1.79) | 1.00  |
|       |           | T   | 35 | 0.29 | 37 | 0.3  |                  |       |
|       |           | C/C | 27 | 0.45 | 28 | 0.45 |                  |       |
|       |           | C/T | 31 | 0.52 | 31 | 0.5  |                  |       |
|       |           | T/T | 2  | 0.03 | 3  | 0.05 |                  |       |
| IL-4  | rs2243250 | C   | 81 | 0.68 | 96 | 0.77 | 0.61 (0.34-1.07) | 0.087 |
|       |           | T   | 39 | 0.32 | 28 | 0.23 |                  |       |
|       |           | C/C | 29 | 0.48 | 38 | 0.61 |                  |       |
|       |           | C/T | 23 | 0.38 | 20 | 0.32 |                  |       |
|       |           | T/T | 8  | 0.13 | 4  | 0.06 |                  |       |
| IL-13 | rs1800925 | C   | 91 | 0.76 | 87 | 0.7  | 1.34 (0.76-2.35) | 0.387 |
|       |           | T   | 29 | 0.24 | 37 | 0.3  |                  |       |
|       |           | C/C | 34 | 0.57 | 29 | 0.47 |                  |       |
|       |           | C/T | 23 | 0.38 | 29 | 0.47 |                  |       |
|       |           | T/T | 3  | 0.05 | 4  | 0.06 |                  |       |
| INFG  | rs2830561 | A   | 69 | 0.57 | 78 | 0.63 | 0.80 (0.48-1.33) | 0.433 |
|       |           | T   | 51 | 0.42 | 46 | 0.37 |                  |       |
|       |           | A/A | 14 | 0.23 | 18 | 0.29 |                  |       |
|       |           | A/T | 41 | 0.68 | 42 | 0.68 |                  |       |
|       |           | T/T | 5  | 0.08 | 2  | 0.03 |                  |       |
| INFG2 | rs2834213 | A   | 85 | 0.71 | 92 | 0.74 | 0.85 (0.48-1.48) | 0.569 |
|       |           | G   | 35 | 0.29 | 32 | 0.26 |                  |       |
|       |           | A/A | 32 | 0.53 | 35 | 0.56 |                  |       |
|       |           | A/G | 21 | 0.35 | 22 | 0.35 |                  |       |
|       |           | G/G | 7  | 0.12 | 5  | 0.08 |                  |       |

\*adjusted by age and gender

IL-1R1 rs2234650: Dominant model C/T-T/T Vs C/C, OR 4.14 (1.41-12.19) p 0.0071;

IL6 rs1800795: Dominant model G/C-C/C Vs G/G, OR 0.36 (0.17-0.76) p 0.017

**Table S2.** Evaluation of the association of the alleles and genotypes of cytokine gene polymorphisms with the anti-SARS-CoV-2 S1/S2 antibody titers after 105 days from the administration of the second dose of recombinant mRNA vaccine (83 uninfected subjects)

| Genes and alleles |           | Day 105        |       |                |                  |             |                   | p*    |
|-------------------|-----------|----------------|-------|----------------|------------------|-------------|-------------------|-------|
|                   |           | Titer < median |       | Titer ≥ median |                  | OR (95% CI) |                   |       |
|                   |           | N              | Freq. | N              | Freq.            |             |                   |       |
| IL-1A             | rs1800587 | C              | 55    | 0.65           | 53               | 0.65        | 1.04 (0.548-1.96) | 1.00  |
|                   |           | T              | 29    | 0.35           | 29               | 0.35        |                   |       |
|                   |           | C/C            | 17    | 0.4            | 14               | 0.34        |                   |       |
|                   |           | C/T            | 21    | 0.5            | 25               | 0.61        |                   |       |
|                   |           | T/T            | 4     | 0.1            | 2                | 0.05        |                   |       |
| IL-1B             | rs1143634 | C              | 58    | 0.69           | 58               | 0.71        | 0.92 (0.47-1.79)  | 0.867 |
|                   |           | T              | 26    | 0.31           | 24               | 0.29        |                   |       |
|                   |           | C/C            | 21    | 0.5            | 19               | 0.46        |                   |       |
|                   |           | C/T            | 16    | 0.38           | 20               | 0.49        |                   |       |
|                   |           | T/T            | 5     | 0.12           | 2                | 0.05        |                   |       |
|                   | rs16944   | G              | 55    | 0.65           | 54               | 0.66        | 0.98 (0.52-1.87)  | 1.00  |
|                   |           | A              | 29    | 0.35           | 28               | 0.34        |                   |       |
|                   |           | G/G            | 18    | 0.43           | 15               | 0.37        |                   |       |
|                   |           | A/G            | 19    | 0.45           | 24               | 0.59        |                   |       |
| A/A               | 5         | 0.12           | 2     | 0.05           | 0.36 (0.06-2.13) | 0.241       |                   |       |
| IL-1RN            | rs315952  | T              | 58    | 0.69           | 55               | 0.67        | 1.09 (0.57-2.10)  | 0.868 |
|                   |           | C              | 26    | 0.31           | 27               | 0.33        |                   |       |
|                   |           | T/T            | 19    | 0.45           | 15               | 0.37        |                   |       |
|                   |           | C/T            | 20    | 0.48           | 25               | 0.61        |                   |       |
|                   |           | C/C            | 3     | 0.07           | 1                | 0.02        |                   |       |
| IL-1R1            | rs2234650 | C              | 50    | 0.6            | 40               | 0.49        | 1.54 (0.83-2.85)  | 0.212 |
|                   |           | T              | 34    | 0.4            | 42               | 0.51        |                   |       |
|                   |           | C/C            | 12    | 0.29           | 4                | 0.10        |                   |       |
|                   |           | C/T            | 26    | 0.62           | 32               | 0.78        |                   |       |
|                   |           | T/T            | 4     | 0.1            | 5                | 0.12        |                   |       |
| IL6               | rs1800795 | G              | 61    | 0.73           | 67               | 0.82        | 0.59 (0.28-1.24)  | 0.197 |
|                   |           | C              | 23    | 0.27           | 15               | 0.18        |                   |       |
|                   |           | G/G            | 25    | 0.6            | 28               | 0.68        |                   |       |
|                   |           | C/G            | 11    | 0.26           | 11               | 0.27        |                   |       |
|                   |           | C/C            | 6     | 0.14           | 2                | 0.05        |                   |       |
| TNFA              | rs1800629 | G              | 70    | 0.83           | 72               | 0.88        | 0.69 (0.29-1.67)  | 0.509 |
|                   |           | A              | 14    | 0.17           | 10               | 0.12        |                   |       |
|                   |           | G/G            | 29    | 0.69           | 31               | 0.76        |                   |       |
|                   |           | G/A            | 12    | 0.29           | 10               | 0.24        |                   |       |
|                   |           | A/A            | 1     | 0.02           | 0                | 0           |                   |       |
| IL-18             | rs 187238 | G              | 59    | 0.7            | 63               | 0.77        | 0.71 (0.35-1.42)  | 0381  |
|                   |           | C              | 25    | 0.3            | 19               | 0.23        |                   |       |
|                   |           | G/G            | 21    | 0.5            | 23               | 0.56        |                   |       |
|                   |           | C/G            | 17    | 0.4            | 17               | 0.41        |                   |       |
|                   |           | C/C            | 4     | 0.1            | 1                | 0.02        |                   |       |
|                   | rs1946518 | G              | 45    | 0.54           | 46               | 0.56        | 0.90 (0.49-1.66)  | 0.757 |
|                   |           | T              | 39    | 0.46           | 36               | 0.44        |                   |       |
|                   |           | G/G            | 10    | 0.24           | 9                | 0.22        |                   |       |
|                   |           | G/T            | 25    | 0.6            | 28               | 0.68        |                   |       |
| T/T               | 7         | 0.17           | 4     | 0.1            | 0.64 (0.16-2.49) | 0.519       |                   |       |
| IL-10             | rs1800896 | A              | 43    | 0.51           | 41               | 0.5         | 1.05 (0.57-1.93)  | 1.00  |
|                   |           | G              | 41    | 0.49           | 41               | 0.5         |                   |       |
|                   |           | A/A            | 11    | 0.26           | 10               | 0.24        |                   |       |
|                   |           | A/G            | 21    | 0.5            | 21               | 0.51        |                   |       |
|                   |           | G/G            | 10    | 0.24           | 10               | 0.24        |                   |       |

|        |           |     |    |      |    |      |                  |       |
|--------|-----------|-----|----|------|----|------|------------------|-------|
|        | rs1800872 | C   | 64 | 0.76 | 62 | 0.76 | 1.03 (0.51-2.10) | 1.00  |
|        |           | A   | 20 | 0.24 | 20 | 0.24 |                  |       |
|        |           | C/C | 24 | 0.57 | 23 | 0.56 |                  |       |
|        |           | A/C | 16 | 0.38 | 16 | 0.39 |                  |       |
|        |           | A/A | 2  | 0.05 | 2  | 0.05 |                  |       |
|        | rs3021097 | C   | 61 | 0.73 | 55 | 0.67 | 1.30 (0.67-2.53) | 0.499 |
|        |           | T   | 23 | 0.27 | 27 | 0.33 |                  |       |
|        |           | C/C | 21 | 0.5  | 17 | 0.41 |                  |       |
|        |           | C/T | 19 | 0.45 | 21 | 0.51 |                  |       |
|        |           | T/T | 2  | 0.05 | 3  | 0.07 |                  |       |
| IL-4   | rs2243250 | C   | 68 | 0.81 | 60 | 0.73 | 0.64 (0.31-1.33) | 0.270 |
|        |           | T   | 16 | 0.19 | 22 | 0.27 |                  |       |
|        |           | C/C | 30 | 0.71 | 22 | 0.54 |                  |       |
|        |           | C/T | 8  | 0.19 | 16 | 0.39 |                  |       |
|        |           | T/T | 4  | 0.1  | 3  | 0.07 |                  |       |
| IL-13  | rs1800925 | C   | 64 | 0.76 | 62 | 0.76 | 1.03 (0.51-2.10) | 1.00  |
|        |           | T   | 20 | 0.24 | 20 | 0.24 |                  |       |
|        |           | C/C | 23 | 0.55 | 23 | 0.56 |                  |       |
|        |           | C/T | 18 | 0.43 | 16 | 0.39 |                  |       |
|        |           | T/T | 1  | 0.02 | 2  | 0.05 |                  |       |
| INFG   | rs2830561 | A   | 48 | 0.57 | 52 | 0.63 | 0.77 (0.41-1.43) | 0.432 |
|        |           | T   | 36 | 0.43 | 30 | 0.37 |                  |       |
|        |           | A/A | 10 | 0.24 | 13 | 0.32 |                  |       |
|        |           | A/T | 28 | 0.67 | 26 | 0.63 |                  |       |
|        |           | T/T | 4  | 0.1  | 2  | 0.05 |                  |       |
| INFGR2 | rs2834213 | A   | 62 | 0.74 | 60 | 0.73 | 1.03 (0.52-2.06) | 1.00  |
|        |           | G   | 22 | 0.26 | 22 | 0.27 |                  |       |
|        |           | A/A | 25 | 0.6  | 22 | 0.54 |                  |       |
|        |           | A/G | 12 | 0.29 | 16 | 0.39 |                  |       |
|        |           | G/G | 5  | 0.12 | 3  | 0.07 |                  |       |

\*adjusted by age and gender

IL-1R1 RS2234650 C/T dominant model C/T-T/T Vs C/C, OR 3.67 (1.04-12.99) p 0.033;

**Table S3.** Evaluation of the association between cytokine gene polymorphisms and the development of SARS-CoV-2 breakthrough infection within day 105 after administration of the second dose of recombinant mRNA vaccine

| Genes and alleles |           |     | Uninfected subjects |       | Infected subjects |       | OR (95% CI)       | p*    |
|-------------------|-----------|-----|---------------------|-------|-------------------|-------|-------------------|-------|
|                   |           |     | N                   | Freq. | N                 | Freq. |                   |       |
| IL-1A             | rs1800587 | C   | 108                 | 0.65  | 48                | 0.62  | 1.16 (0.67-2.03)  | 0.668 |
|                   |           | T   | 58                  | 0.35  | 30                | 0.38  |                   |       |
|                   |           | C/C | 31                  | 0.37  | 12                | 0.31  | 1.34 (0.59-3.02)  | 0.545 |
|                   |           | C/T | 46                  | 0.55  | 24                | 0.62  | 1.45 (0.65-3.23)  | 0.361 |
|                   |           | T/T | 6                   | 0.07  | 3                 | 0.08  | 0.90 (0.21-3.92)  | 0.889 |
| IL-1B             | rs1143634 | C   | 116                 | 0.7   | 47                | 0.6   | 1.53 (0.87-2.68)  | 0.147 |
|                   |           | T   | 50                  | 0.3   | 31                | 0.4   | 2.09 (0.94-4.68)  | 0.079 |
|                   |           | C/C | 40                  | 0.48  | 12                | 0.31  |                   |       |
|                   |           | C/T | 36                  | 0.43  | 23                | 0.59  | 1.97 (0.90-4.33)  | 0.087 |
|                   |           | T/T | 7                   | 0.08  | 4                 | 0.1   | 1.25 (0.34-4.61)  | 0.745 |
|                   | rs16944   | G   | 109                 | 0.66  | 52                | 0.67  | 0.96 (0.54-1.69)  | 1.00  |
|                   |           | A   | 57                  | 0.34  | 26                | 0.33  |                   |       |
|                   |           | G/G | 33                  | 0.4   | 16                | 0.41  | 0.95 (0.44-2.06)  | 1.00  |
|                   |           | A/G | 43                  | 0.52  | 20                | 0.51  | 0.97 (0.44-2.13)  | 0.941 |
| IL-1RN            | rs315952  | A/A | 7                   | 0.08  | 3                 | 0.08  | 0.81 (0.20-3.39)  | 0.784 |
|                   |           | T   | 113                 | 0.68  | 55                | 0.71  | 0.89 (0.49-1.60)  | 0.768 |
|                   |           | C   | 53                  | 0.32  | 23                | 0.29  |                   |       |
|                   |           | T/T | 34                  | 0.41  | 19                | 0.49  | 0.73 (0.34-1.57)  | 0.440 |
|                   |           | C/T | 45                  | 0.54  | 17                | 0.44  | 0.70 (0.32-1.54)  | 0.383 |
| IL-1R1            | rs2234650 | C/C | 4                   | 0.05  | 3                 | 0.08  | 1.35 (0.28-6.54)  | 0.709 |
|                   |           | C   | 90                  | 0.54  | 44                | 0.56  | 0.92 (0.53-1.57)  | 0.784 |
|                   |           | T   | 76                  | 0.46  | 34                | 0.44  |                   |       |
|                   |           | C/C | 16                  | 0.19  | 5                 | 0.13  | 1.62 (0.55-4.81)  | 0.449 |
|                   |           | C/T | 58                  | 0.70  | 34                | 0.87  | 3.33 (1.14-9.74)  | 0.018 |
| IL-6              | rs1800795 | T/T | 9                   | 0.11  | 0                 | 0     | ---               | ---   |
|                   |           | G   | 128                 | 0.77  | 46                | 0.59  | 2.34 (1.31-4.18)  | 0.006 |
|                   |           | C   | 38                  | 0.23  | 32                | 0.41  |                   |       |
|                   |           | G/G | 53                  | 0.64  | 17                | 0.44  | 0.44 (0.20-0.95)  | 0.049 |
|                   |           | C/G | 22                  | 0.27  | 12                | 0.31  | 1.21 (0.52-2.83)  | 0.651 |
| TNFA              | rs1800629 | C/C | 8                   | 0.1   | 10                | 0.26  | 2.89 (1.01-8.26)  | 0.048 |
|                   |           | G   | 142                 | 0.86  | 60                | 0.77  | 1.77 (0.91-3.51)  | 0.104 |
|                   |           | A   | 24                  | 0.14  | 18                | 0.23  |                   |       |
|                   |           | G/G | 60                  | 0.72  | 25                | 0.64  | 1.46 (0.65-3.29)  | 0.402 |
|                   |           | G/A | 22                  | 0.27  | 10                | 0.26  | 0.86 (0.35-2.09)  | 0.732 |
| IL-18             | rs 187238 | A/A | 1                   | 0.01  | 4                 | 0.1   | 8.72 (0.92-82.84) | 0.031 |
|                   |           | G   | 122                 | 0.73  | 56                | 0.72  | 1.09 (0.59-1.99)  | 0.877 |
|                   |           | C   | 44                  | 0.27  | 22                | 0.28  |                   |       |
|                   |           | G/G | 44                  | 0.53  | 18                | 0.46  | 1.32 (0.61-2.82)  | 0.561 |
|                   |           | C/G | 34                  | 0.41  | 20                | 0.51  | 1.39 (0.64-3.04)  | 0.412 |
|                   | rs1946518 | C/C | 5                   | 0.06  | 1                 | 0.03  | 0.35 (0.04-3.20)  | 0.331 |
|                   |           | G   | 91                  | 0.55  | 41                | 0.53  | 1.09 (0.64-1.88)  | 0.784 |
|                   |           | T   | 75                  | 0.45  | 37                | 0.47  |                   |       |
|                   |           | G/G | 19                  | 0.23  | 6                 | 0.15  | 1.63 (0.59-4.48)  | 0.471 |
|                   |           | G/T | 53                  | 0.64  | 29                | 0.74  | 1.79 (0.75-4.26)  | 0.178 |
|                   |           | T/T | 11                  | 0.13  | 4                 | 0.1   | 0.69 (0.20-2.38)  | 0.555 |

|        |           |     |     |      |    |      |                  |       |
|--------|-----------|-----|-----|------|----|------|------------------|-------|
| IL-10  | rs1800896 | A   | 84  | 0.51 | 38 | 0.49 | 1.08 (0.63-1.85) | 0.891 |
|        |           | G   | 82  | 0.49 | 40 | 0.51 |                  |       |
|        |           | A/A | 21  | 0.25 | 9  | 0.23 |                  |       |
|        |           | A/G | 42  | 0.51 | 20 | 0.51 |                  |       |
|        |           | G/G | 20  | 0.24 | 10 | 0.26 |                  |       |
|        | rs1800872 | C   | 126 | 0.76 | 64 | 0.82 | 0.69 (0.35-1.36) | 0.323 |
|        |           | A   | 40  | 0.24 | 14 | 0.18 |                  |       |
|        |           | C/C | 47  | 0.57 | 26 | 0.67 |                  |       |
|        |           | A/C | 32  | 0.39 | 12 | 0.31 |                  |       |
|        |           | A/A | 4   | 0.05 | 1  | 0.03 |                  |       |
|        | rs3021097 | C   | 116 | 0.7  | 56 | 0.72 | 0.91 (0.50-1.65) | 0.881 |
|        |           | T   | 50  | 0.3  | 22 | 0.28 |                  |       |
|        |           | C/C | 38  | 0.46 | 17 | 0.44 |                  |       |
|        |           | C/T | 40  | 0.48 | 22 | 0.56 |                  |       |
|        |           | T/T | 5   | 0.06 | 0  | 0    |                  |       |
| IL-4   | rs2243250 | C   | 128 | 0.77 | 49 | 0.63 | 1.99 (1.11-3.58) | 0.022 |
|        |           | T   | 38  | 0.23 | 29 | 0.37 |                  |       |
|        |           | C/C | 52  | 0.63 | 15 | 0.38 |                  |       |
|        |           | C/T | 24  | 0.29 | 19 | 0.49 |                  |       |
|        |           | T/T | 7   | 0.08 | 5  | 0.13 |                  |       |
| IL-13  | rs1800925 | C   | 126 | 0.76 | 52 | 0.67 | 1.57 (0.87-2.84) | 0.164 |
|        |           | T   | 40  | 0.24 | 26 | 0.33 |                  |       |
|        |           | C/C | 46  | 0.55 | 17 | 0.44 |                  |       |
|        |           | C/T | 34  | 0.41 | 18 | 0.46 |                  |       |
|        |           | T/T | 3   | 0.04 | 4  | 0.1  |                  |       |
| INFG   | rs2830561 | A   | 100 | 0.6  | 47 | 0.6  | 0.99 (0.58-1.73) | 1.00  |
|        |           | T   | 66  | 0.4  | 31 | 0.4  |                  |       |
|        |           | A/A | 23  | 0.28 | 9  | 0.23 |                  |       |
|        |           | A/T | 54  | 0.65 | 29 | 0.74 |                  |       |
|        |           | T/T | 6   | 0.07 | 1  | 0.03 |                  |       |
| INFGR2 | rs2834213 | A   | 122 | 0.73 | 55 | 0.71 | 1.16 (0.64-2.11) | 0.646 |
|        |           | G   | 44  | 0.27 | 23 | 0.29 |                  |       |
|        |           | A/A | 47  | 0.57 | 20 | 0.51 |                  |       |
|        |           | A/G | 28  | 0.34 | 15 | 0.38 |                  |       |
|        |           | G/G | 8   | 0.1  | 4  | 0.1  |                  |       |

\*adjusted by age and gender

IL6 rs1800795: Dominant model G/C-C/C Vs G/G, OR 2.29 (1.05-4.96) p 0.045

IL-4 rs2243250: Dominant model C/T-T/T Vs C/C, OR 2.67 (1.21-5.88) p 0.014
